# Supplementary material for: All-purpose nanostrategy based on dose deposition enhancement, cell cycle arrest, DNA damage, and ROS production as prostate cancer radiosensitizer for potential clinical translation
Source: Royal Society of Chemistry journal article supplement (doi:10.1039/d1nr03869a), 2021-01-01
Supplement: d1nr03869a1.pdf [file d1nr03869a1.pdf]

1 All-purpose nanostrategy based on dose  
2 deposition enhancement, cell cycle arrest,  
3 DNA damage and ROS production as prostate  
4 cancer radiosensitizer for potential clinical  
5 translation

6 Xiao-xiao Guo <sup>a, d</sup>, Zhen-hu Guo <sup>b</sup>, Jing-song Lu <sup>b</sup>, Wen-sheng Xie <sup>b</sup>, Qiu-zi Zhong <sup>c</sup>,  
7 Xiao-dan Sun <sup>b</sup>, Xiu-mei Wang<sup>b</sup>, Jian-ye Wang <sup>a, \*</sup>, Ming Liu <sup>a, \*</sup>, and Ling-yun Zhao  
8 <sup>b, \*</sup>

9 <sup>a</sup> Department of Urology, National Center of Gerontology, Institute of Geriatric  
10 Medicine, Beijing Hospital, Chinese Academy of Medical Science, Beijing, 100730,  
11 China

12 <sup>b</sup> Key Laboratory of Advanced Materials, Ministry of Education of China, School of  
13 Materials Science and Engineering, Tsinghua University, Beijing, 100084, China

14 <sup>c</sup> Department of Radiotherapy, National Center of Gerontology, Institute of Geriatric  
15 Medicine, Beijing Hospital, Chinese Academy of Medical Science, Beijing, 100730,  
16 China

17 <sup>d</sup> Graduate School of Peking Union Medical College, Beijing, 100730, China

18 \* Corresponding authors

19

20

21

## 22 **Synthesis of Au core**

23 0.25 mmol of gold chloride trihydrate ( $\text{HAuCl}_4 \cdot 3\text{H}_2\text{O}$ ) was dissolved in the mixture  
24 solution of hexane (10 mL) and oleylamine (10 mL) in a four-necked flask. The system  
25 was stirred at  $5^\circ\text{C}$  under argon atmosphere. Then, 0.25 mmol of borane-tert-butylamine  
26 complex was dissolved in the mixture solution of hexane (1 mL) and oleylamine (1 mL)  
27 and added into the system. The mixture was stirred for 2h at  $5^\circ\text{C}$  before acetone was  
28 added to collect AuNPs via centrifugation at 10000 rpm for 8 min. The products were  
29 washed for 3 times by ethanol and finally re-dispersed in hexane for future use. TEM  
30 image shows the uniform size of Au NPs.

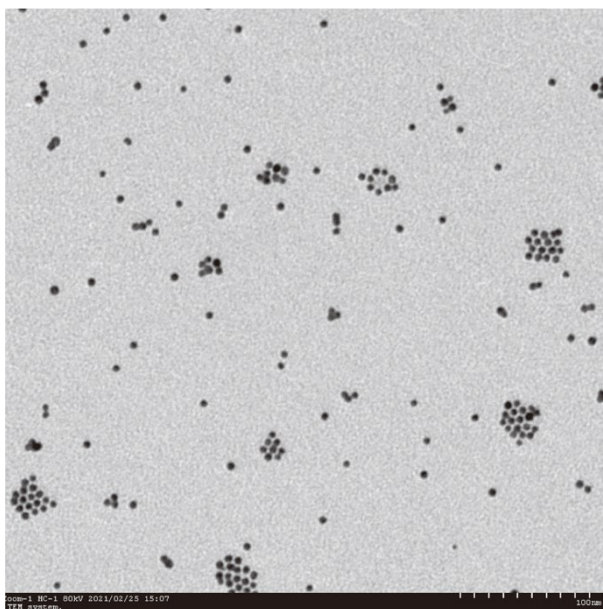

32 **Figure S1.** TEM imaging of 5nm naked Au nanospheres

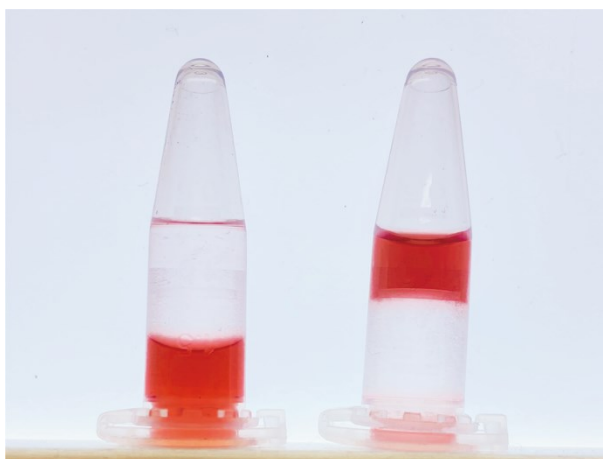

33

34 **Figure S2.** The amphipathy of Au-DUPA NPs. (a) Au -DUPA NPs were dissolved in  
 35 dichloromethane, the supernate was water. (b) Au -DUPA NPs dissolved in water, the  
 36 subnatant is dichloromethane.

37

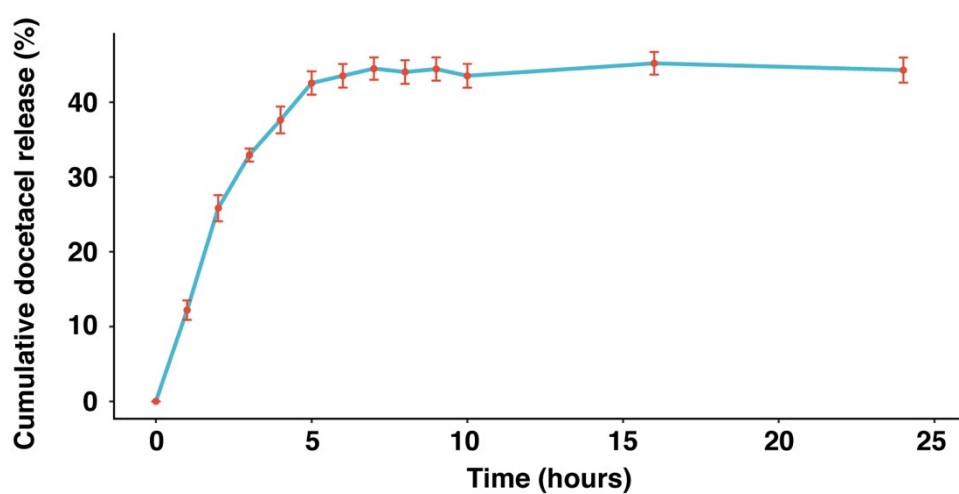

38

39 **Figure S3.** Cumulative DTX release from Au@DTX-DUPA NPs at the indicated times  
 40 (Solvent: Hank's Balanced Salt Solution [HBSS]; temperature = 37 °C; pH=7.4).

41

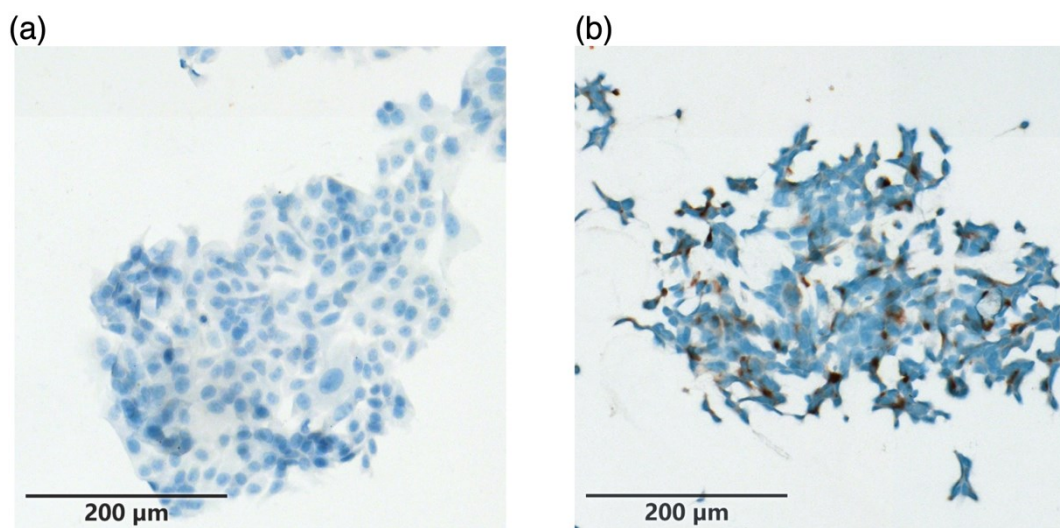

42

43 **Figure S4.** Immunohistochemical validation of prostate specific membrane antigen  
 44 (PSMA) expression in (a) PC3 cell line; (b) 22RV1 cell line. Brown stain represents  
 45 the expression of PSMA.

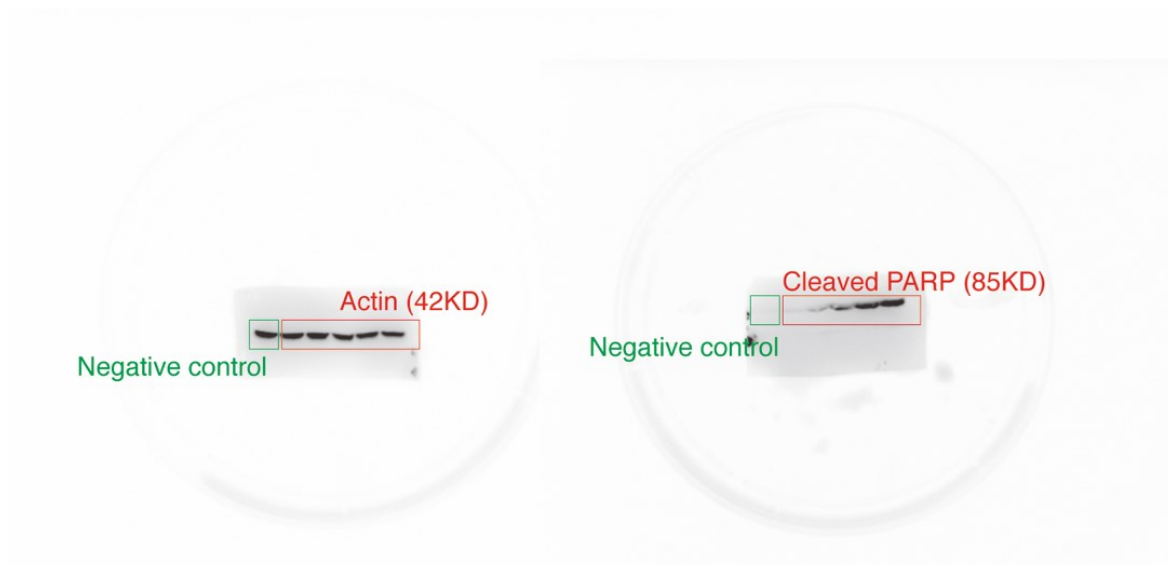

46

47 **Figure S5.** The uncropped and unprocessed image of the full gel and blot.

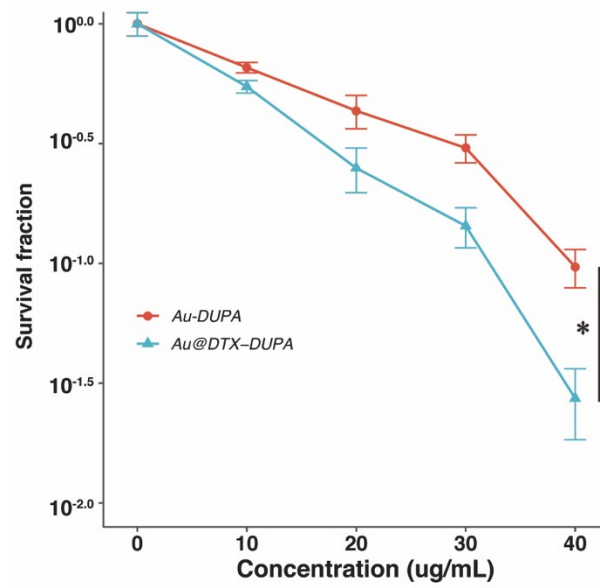

48

49 **Figure S6.** Survival curves of 22RV1 cells incubated with Au-DUPA NPs or  
 50 Au@DOC-DUPA NPs at various concentrations under 4 Gy electron irradiation. Data  
 51 are represented as mean  $\pm$  SD (n=5), \* P < 0.05.

52

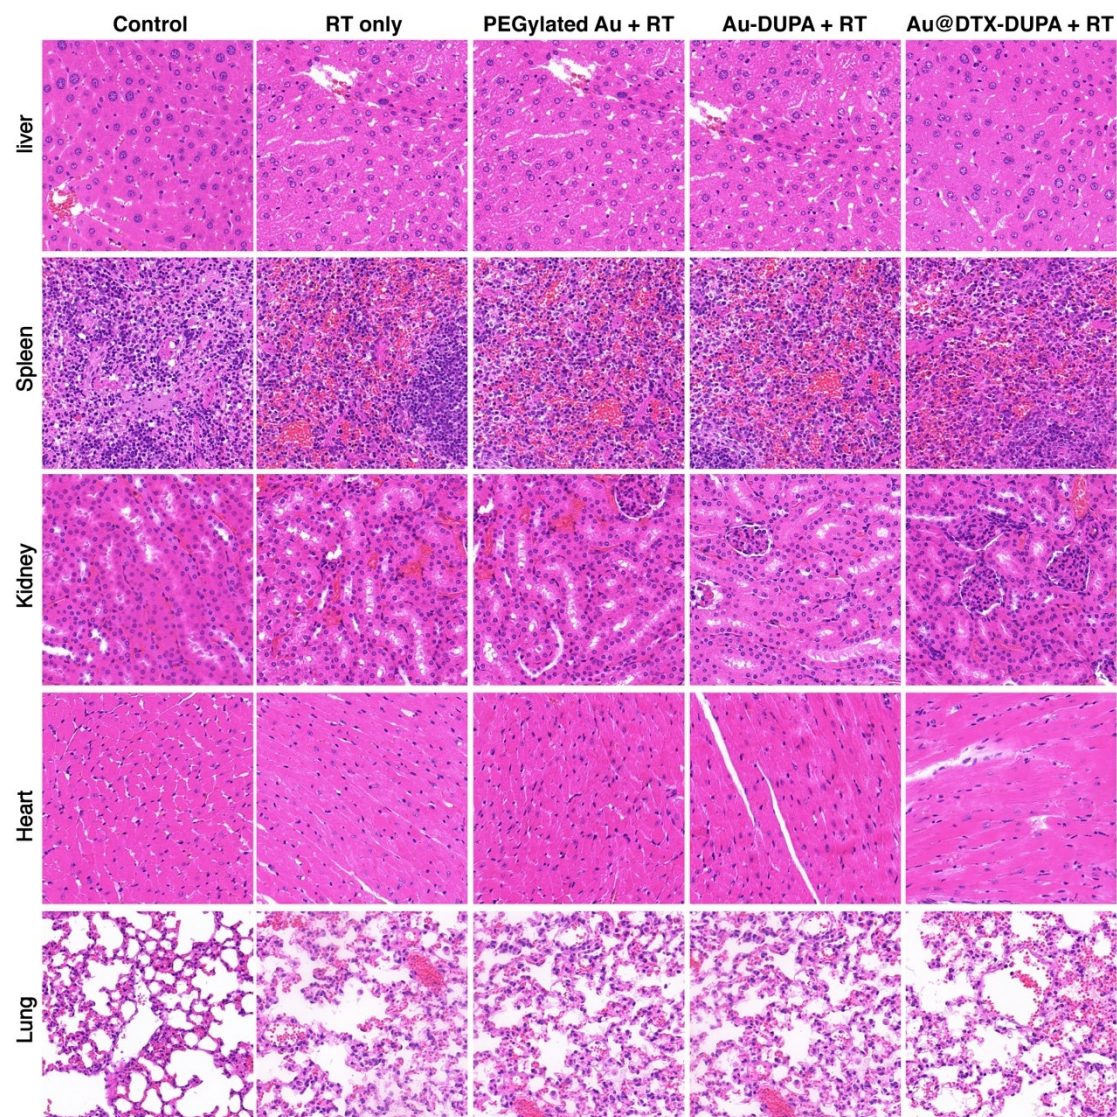

53

54 **Figure S7.** H&E staining slices of liver, spleen, kidney, heart, and lung, at the 14<sup>th</sup> day  
 55 following various treatments. Neither prominent damage nor inflammation were  
 56 observed.

57

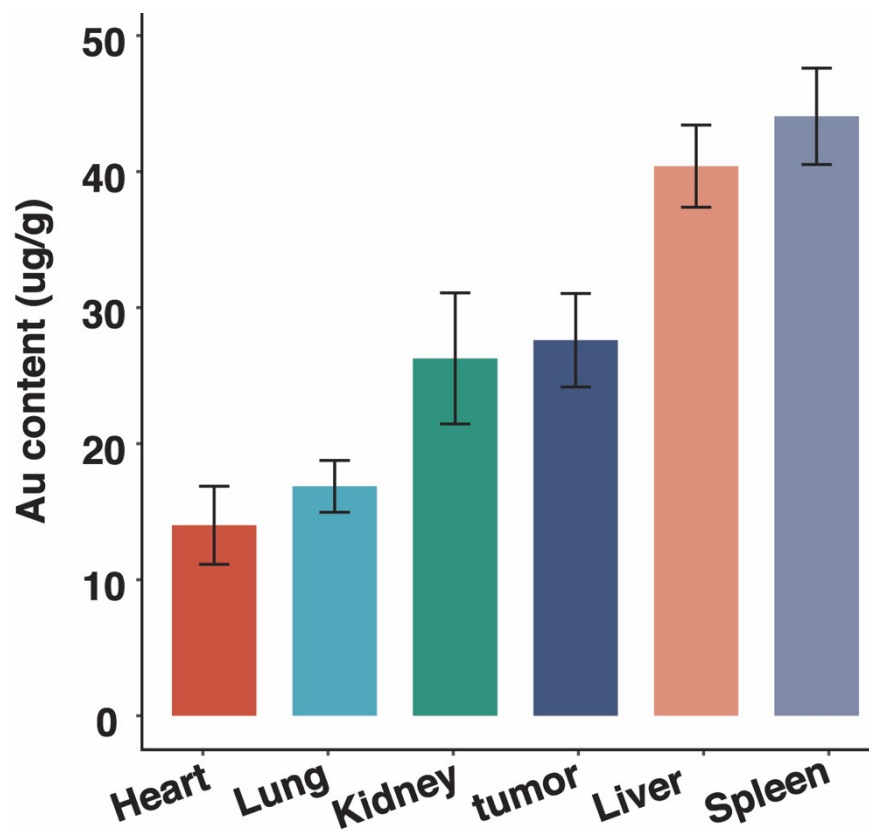

58

59 **Figure S8.** The Au content of main viscus and tumor at 24 h after injection of

60 Au@DTX-DUPA NPs. Data are represented as mean  $\pm$  SD (n=3).

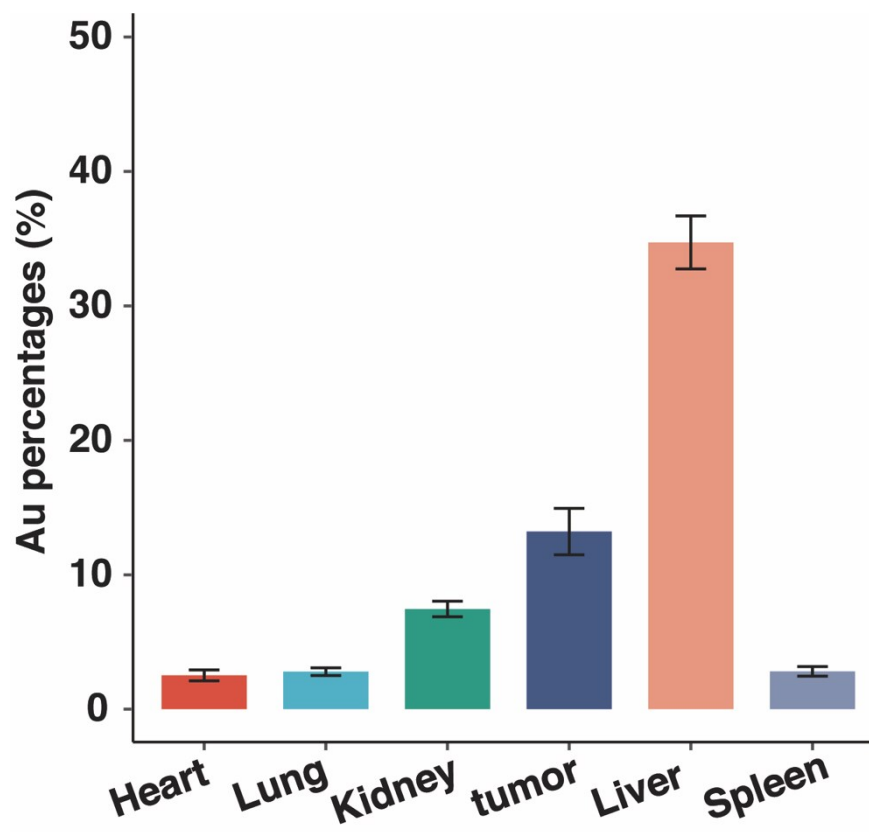

61

62 **Figure S9.** The Au percentages of main viscus and tumor at 24 h after injection of  
 63 Au@DTX-DUPA NPs. Data are represented as mean  $\pm$  SD (n=3).
